# Supplementary material for: Introducing Oxygen Vacancies in Li4Ti5O12 via Hydrogen Reduction for High-Power Lithium-Ion Batteries
Source: MDPI journal article supplement (doi:10.3390/pr9091655), 2021-09-14
Supplement: s1 [file s1]

## Supplementary Materials

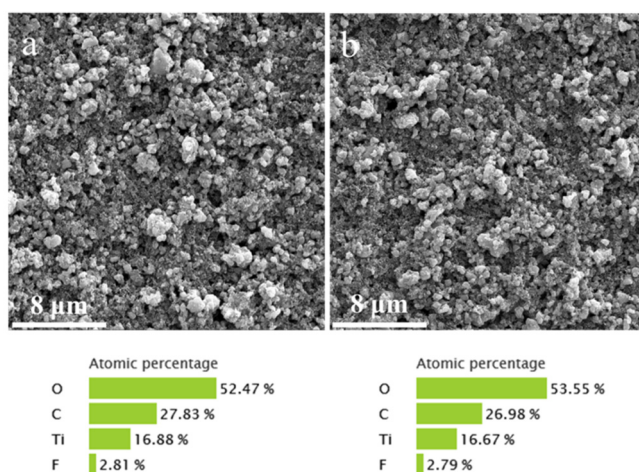

**Figure S1.** SEM (top) and EDX (bottom) results of the prepared electrodes of LTO (a), HLTO (b).

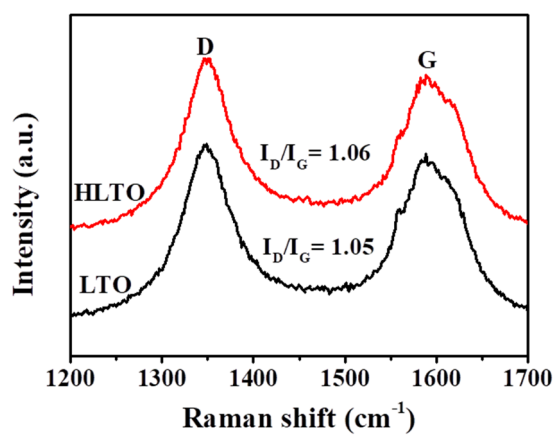

**Figure S2.** Partial Raman spectra of HLTO and LTO.

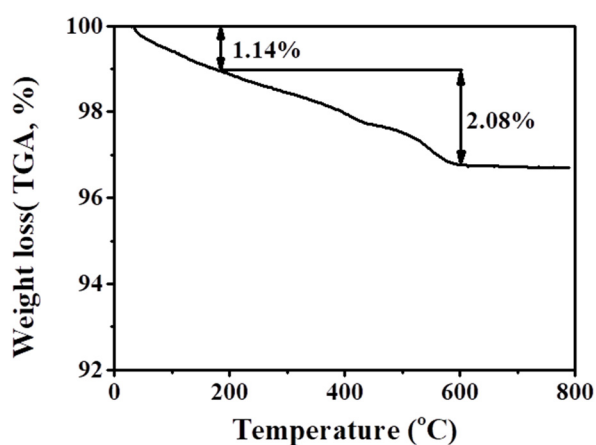

**Figure S3.** TGA results of commercial LTO.

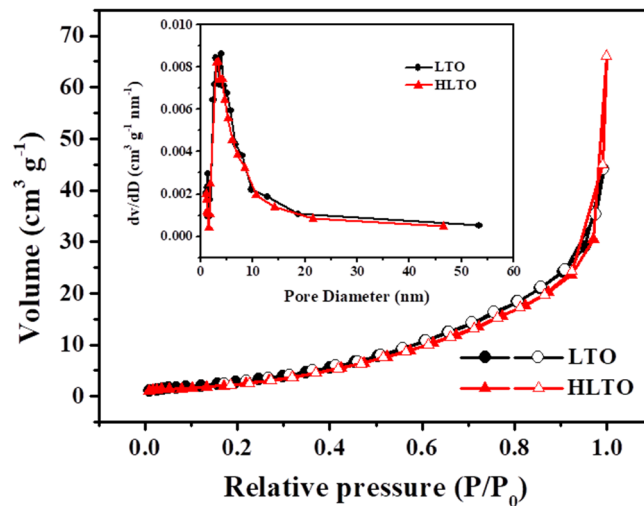

**Figure S4.** N<sub>2</sub> adsorption/desorption curves of HLTO and LTO. The inset shows the pore size distribution of both samples from adsorption branch.

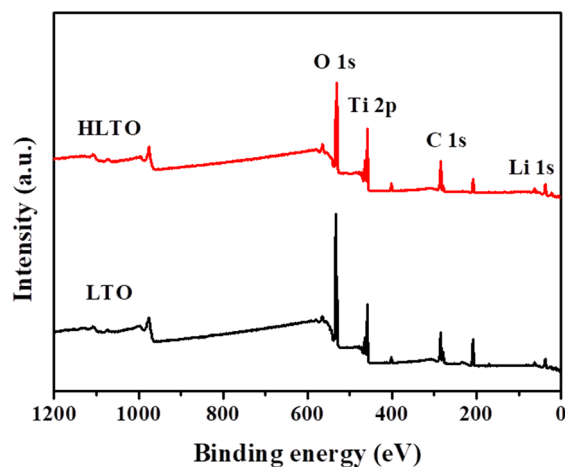

**Figure S5.** XPS spectra of HLTO and LTO.

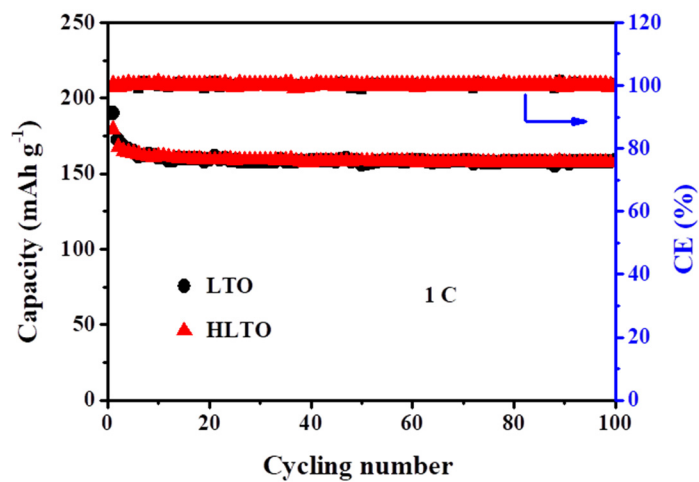

**Figure S6.** Cycling performance of LTO and HLTO at 1 C.

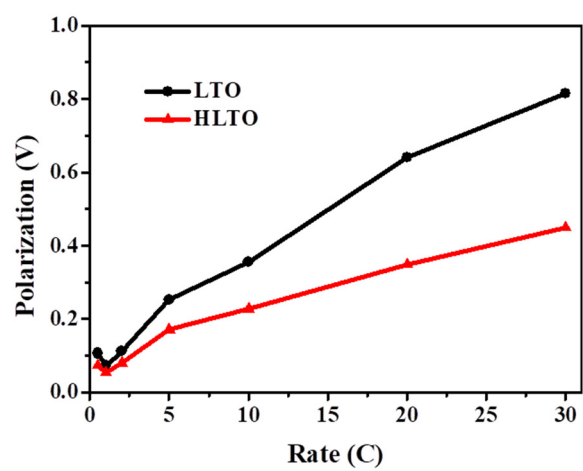

**Figure S7.** The polarization results of both samples at different rates.
