# Supplementary material for: Introducing Oxygen Vacancies in Li4Ti5O12 via Hydrogen Reduction for High-Power Lithium-Ion Batteries
Source: MDPI journal article supplement (doi:10.3390/pr9091655), 2021-09-14
Supplement: s1 [file s1]

Archive with 1 entries (1 files):
- processes-1328468-supplementary.pdf
